# Supplementary material for: Multiple Head Rotations Result in Persistent Gait Alterations in Piglets
Source: MDPI journal article supplement (doi:10.3390/biomedicines10112976), 2022-11-19
Supplement: s1 [file s1]

**Table S1.** Summary of daily group averages for each parameter. Values represent the calculated group average  $\pm$  standard error.

|                        | Pre-Injury          |                     |                     | Day +1              |                     |                     | Day +4               |                     |                     | Day +7              |                     |                     |
|------------------------|---------------------|---------------------|---------------------|---------------------|---------------------|---------------------|----------------------|---------------------|---------------------|---------------------|---------------------|---------------------|
|                        | Sham                | Singl<br>e          | Multi<br>ple        | Sham                | Singl<br>e          | Multi<br>ple        | Sham                 | Singl<br>e          | Multi<br>ple        | Sham                | Singl<br>e          | Multi<br>ple        |
| Number of Stances      | 21.87<br>$\pm 0.63$ | 22.2 $\pm$<br>0.67  | 16.7 $\pm$<br>0.68  | 21.75 $\pm$<br>1.27 | 19.3 $\pm$<br>0.97  | 23.71<br>$\pm 1.30$ | 18.87<br>$\pm 0.58$  | 18.5 $\pm$<br>0.65  | 20.71<br>$\pm 0.91$ | 18.12<br>$\pm 0.74$ | 17 $\pm 0$ .<br>45  | 18.28<br>$\pm 0.56$ |
| Gait Time (s)          | 2.35 $\pm$<br>0.17  | 2.74 $\pm$<br>0.19  | 2.72 $\pm$<br>0.24  | 2.31 $\pm 0$<br>.25 | 3.39 $\pm$<br>0.50  | 6.79 $\pm$<br>2.21  | 1.96 $\pm$<br>0.12   | 2.32 $\pm$<br>0.17  | 2.54 $\pm$<br>0.15  | 1.79 $\pm$<br>0.12  | 2.10 $\pm$<br>0.11  | 2.24 $\pm$<br>0.25  |
| Velocity (cm/s)        | 80.68<br>$\pm 5.62$ | 67.59<br>$\pm 4.38$ | 70.25<br>$\pm 6.42$ | 84.57 $\pm$<br>10.1 | 60.16<br>$\pm 5.66$ | 42.21<br>$\pm 10.2$ | 97.37<br>$\pm 5.62$  | 79.99<br>$\pm 4.77$ | 76.35<br>$\pm 4.42$ | 102 $\pm 7$<br>.83  | 88.5 $\pm$<br>5.46  | 77.05<br>$\pm 4.90$ |
| Cycle Time (s)         | 0.47 $\pm$<br>0.03  | 0.54 $\pm$<br>0.03  | 0.54 $\pm$<br>0.04  | 0.47 $\pm 0$<br>.03 | 0.64 $\pm$<br>0.06  | 1.20 $\pm$<br>0.34  | 0.44 $\pm$<br>0.01   | 0.51 $\pm$<br>0.02  | 0.57 $\pm$<br>0.03  | 0.43 $\pm$<br>0.01  | 0.50 $\pm$<br>0.02  | 0.55 $\pm$<br>0.039 |
| Cycles Per Minute      | 133 $\pm 8$<br>.29  | 114.6<br>$\pm 6.7$  | 116 $\pm 7$<br>.5   | 134.3 $\pm$<br>10.8 | 100 $\pm 6$<br>.9   | 74 $\pm 13$<br>.9   | 140.6<br>2 $\pm 5.8$ | 121.3<br>$\pm 5.6$  | 116.7<br>$\pm 8.5$  | 142.3<br>$\pm 5.1$  | 122.7<br>$\pm 5.0$  | 114.3<br>$\pm 7.9$  |
| Stance Time (s)        | 0.23 $\pm$<br>0.01  | 0.26 $\pm$<br>0.00  | 0.31 $\pm$<br>0.01  | 0.23 $\pm 0$<br>.01 | 0.28 $\pm$<br>0.01  | 0.67 $\pm$<br>0.08  | 0.21 $\pm$<br>0.01   | 0.26 $\pm$<br>0.01  | 0.28 $\pm$<br>0.01  | 0.21 $\pm$<br>0.00  | 0.26 $\pm$<br>0.00  | 0.30 $\pm$<br>0.01  |
| Stride Length (LF, cm) | 36.99<br>$\pm 0.34$ | 35.74<br>$\pm 0.30$ | 36.63<br>$\pm 0.65$ | 37.56 $\pm$<br>0.63 | 36.06<br>$\pm 0.46$ | 30.94<br>$\pm 1.34$ | 42.03<br>$\pm 0.39$  | 39.97<br>$\pm 0.31$ | 41.37<br>$\pm 0.58$ | 43.89<br>$\pm 0.69$ | 43.60<br>$\pm 0.38$ | 42.06<br>$\pm 0.43$ |
| Stride Length (RF, cm) | 36.81<br>$\pm 0.28$ | 35.86<br>$\pm 0.32$ | 37.10<br>$\pm 0.68$ | 37.50 $\pm$<br>0.64 | 36.14<br>$\pm 0.47$ | 30.89<br>$\pm 1.34$ | 42.19<br>$\pm 0.40$  | 39.93<br>$\pm 0.30$ | 41.47<br>$\pm 0.56$ | 43.93<br>$\pm 0.66$ | 43.77<br>$\pm 0.30$ | 41.94<br>$\pm 0.44$ |
| Stride Length (LH, cm) | 35.23<br>$\pm 0.37$ | 32.35<br>$\pm 0.47$ | 34.11<br>$\pm 0.90$ | 35.74 $\pm$<br>0.86 | 32.15<br>$\pm 0.65$ | 28.76<br>$\pm 1.41$ | 42.20<br>$\pm 0.48$  | 36.76<br>$\pm 0.39$ | 38.64<br>$\pm 0.50$ | 42.09<br>$\pm 0.76$ | 40.35<br>$\pm 0.53$ | 40.94<br>$\pm 0.50$ |
| Stride Length (RH, cm) | 34.68<br>$\pm 0.41$ | 32.13<br>$\pm 0.45$ | 34.71<br>$\pm 0.90$ | 35.58 $\pm$<br>0.89 | 32.36<br>$\pm 0.60$ | 27.66<br>$\pm 1.64$ | 41.59<br>$\pm 0.55$  | 36.72<br>$\pm 0.41$ | 38.89<br>$\pm 0.49$ | 42.89<br>$\pm 0.74$ | 41.29<br>$\pm 0.49$ | 41.07<br>$\pm 0.46$ |

**Table S2.** Comparison between pediatric studies and single and multiple RNR injury models.

|                                           | Pediatric Patients              |                                          |                         | Piglets (vs. SHAM)     |                        |
|-------------------------------------------|---------------------------------|------------------------------------------|-------------------------|------------------------|------------------------|
|                                           | <i>Paper</i>                    | <i>TBI Children vs. Healthy Controls</i> | <i>Time Post-injury</i> | <i>SINGLE</i>          | <i>MULTIPLE</i>        |
| Gait Velocity % Decrease                  | Katz-Leurer et al. 2008 [59]    | (27.74 %)                                | 3-12 months             | (29 %)<br>(1-day post) | (50 %)<br>(1-day post) |
|                                           | Kuhtz-Buschbeck et al. 2003 [9] | (20 %)                                   | 12.1 months             |                        |                        |
|                                           | Katz-Leurer et al. 2011 [10]    | (50 %)                                   | 3.5 years               |                        |                        |
|                                           | Kuhtz-Buschbeck et al. 2003 [7] | (23 %)                                   | 2.8 months              |                        |                        |
|                                           |                                 | (7.05 %)                                 | 7.8 months              |                        |                        |
|                                           | Beretta et al. 2009 [66]        | (46.15 %)                                | 1.4 months              | (18 %)<br>(4-day post) | (22 %)<br>(4-day post) |
|                                           |                                 | (38.46%)                                 | 5.5 months              |                        |                        |
|                                           | Abdul-Rahman et al. 2021 [65]   | (5.84 %)<br>(Single task)                | 2.43 years              |                        |                        |
|                                           |                                 | (12.45 %)<br>(Concurrent motor task)     |                         |                        |                        |
|                                           |                                 | (11.84 %)<br>(Concurrent cognitive task) |                         |                        |                        |
| Howell et al. 2017 [67]<br>(1 concussion) | (1.72 %)<br>(Single task)       | 10.7 days                                |                         |                        |                        |
|                                           | (3.30 %)                        |                                          |                         |                        |                        |

|                                       |                                              |                                          |             |                               |                               |
|---------------------------------------|----------------------------------------------|------------------------------------------|-------------|-------------------------------|-------------------------------|
|                                       |                                              | (Double task)                            |             | <b>(13 %)</b><br>(7-day post) | <b>(24 %)</b><br>(7-day post) |
|                                       | Howell et al. 2017 [67]<br>(≥ 2 concussions) | (7.76 %)<br>(Single task)                | 8.6 days    |                               |                               |
|                                       |                                              | (12.08 %)<br>(Double task)               |             |                               |                               |
|                                       | Berkner et al. 2017 [13]                     | (6.78 %)<br>(Single task)                | 9.5 days    |                               |                               |
|                                       |                                              | (8.70 %)<br>(Double task)                |             |                               |                               |
|                                       | Katz-Leurer et al. 2011 [58]                 | (7.69 %)<br>(Usual walking)              | 3.5 years   |                               |                               |
|                                       |                                              | (38.46 %)<br>(Dual-task numbers)         |             |                               |                               |
|                                       |                                              | (36.36 %)<br>(Dual-task sounds)          |             |                               |                               |
|                                       |                                              |                                          |             |                               |                               |
| Cadence<br>% Decrease                 | Kuhtz-Buschbeck et al. 2003 [9]              | (6.88 %)                                 | 12.1 months | <b>(26 %)</b><br>(1-day post) | <b>(45 %)</b><br>(1-day post) |
|                                       | Kuhtz-Buschbeck et al. 2003 [7]              | (13.25 %)                                | 2.8 months  |                               |                               |
|                                       |                                              | (5.56 %)                                 | 7.8 months  |                               |                               |
|                                       | Abdul-Rahman et al. 2021 [65]                | (5.3 %)<br>(Single task)                 | 2.43 years  | <b>(14 %)</b><br>(4-day post) | <b>(17 %)</b><br>(4-day post) |
|                                       |                                              | (9.14 %)<br>(Concurrent motor task)      |             |                               |                               |
|                                       |                                              | (10.46 %)<br>(Concurrent cognitive task) |             |                               |                               |
|                                       | Howell et al. 2017 [67]<br>(1 concussion)    | (0.4 %)<br>(Single task)                 | 10.7 days   |                               |                               |
|                                       |                                              | (1.40 %)<br>(Double task)                |             |                               |                               |
|                                       | Howell et al. 2017 [67]<br>(≥ 2 concussions) | 0.089 %<br>(Single task)                 | 8.6 days    |                               |                               |
|                                       |                                              | (3.81 %)<br>(Double task)                |             |                               |                               |
|                                       | Berkner et al. 2017 [13]                     | 0.089 %<br>(Single task)                 | 9.5 days    | <b>(14 %)</b><br>(7-day post) | <b>(20 %)</b><br>(7-day post) |
|                                       |                                              | (1.31 %)<br>(Double task)                |             |                               |                               |
|                                       | Abdul-Rahman et al. 2018 [68]                | (5.69 %)<br>(Single task)                | 2.4 years   |                               |                               |
|                                       |                                              | (5.08 %)<br>(Dual-motor task)            |             |                               |                               |
|                                       |                                              | (9.57 %)<br>(Dual-cognitive task)        |             |                               |                               |
| ***<br>Stride<br>Length<br>% Decrease | Kuhtz-Buschbeck et al. 2003 [9]              | (13.21 %)                                | 12.1 months | <b>(7 %)</b><br>(1-day post)  | <b>(19 %)</b><br>(1-day post) |
|                                       | Kuhtz-Buschbeck et al. 2003 [7]              | (16 %)                                   | 2.8 months  |                               |                               |
|                                       |                                              | (7.88 %)                                 | 7.8 months  |                               |                               |
|                                       | Abdul-Rahman et al. 2021 [65]                | (2.25 %)<br>(Single task)                | 2.43 years  | <b>(9 %)</b><br>(4-day post)  | <b>(5 %)</b><br>(4-day post)  |
|                                       |                                              | (6.92 %)<br>(Concurrent motor task)      |             |                               |                               |
|                                       |                                              | (3.98 %)                                 |             |                               |                               |

|                                  |                                                    |                             |           |                      |                       |                       |                       |
|----------------------------------|----------------------------------------------------|-----------------------------|-----------|----------------------|-----------------------|-----------------------|-----------------------|
|                                  |                                                    | (Concurrent cognitive task) |           |                      |                       |                       |                       |
|                                  | Howell et al. 2017 [67]<br>(1 concussion)          | (1.63 %)<br>(Single task)   | 10.7 days |                      |                       |                       |                       |
|                                  |                                                    | (0.93 %)<br>(Double task)   |           |                      |                       |                       |                       |
|                                  | Howell et al. 2017 [67]<br>( $\geq 2$ concussions) | (8.13 %)<br>(Single task)   | 8.6 days  |                      |                       | (2 %)<br>(7-day post) | (4 %)<br>(7-day post) |
|                                  |                                                    | (9.26 %)<br>(Double task)   |           |                      |                       |                       |                       |
|                                  | Berkner et al. 2017 [13]                           | (7.2 %)<br>(Single task)    | 9.5 days  |                      |                       |                       |                       |
|                                  |                                                    | (7.3 %)<br>(Double task)    |           |                      |                       |                       |                       |
| Cycle Time<br>% <b>Increase</b>  | Howell et al. 2017 [67]<br>(1 concussion)          | 0.93 %<br>(Single task)     | 10.7 days | 37 %<br>(1-day post) | 152 %<br>(1-day post) |                       |                       |
|                                  |                                                    | 1.64 %<br>(Double task)     |           | 16 %<br>(4-day post) | 30 %<br>(4-day post)  |                       |                       |
|                                  | Howell et al. 2017 [67]<br>( $\geq 2$ concussions) | 2.78 %<br>(Single task)     | 8.6 days  | 18 %<br>(7-day post) | 30 %<br>(7-day post)  |                       |                       |
|                                  |                                                    | 6.56 %<br>(Double task)     |           |                      |                       |                       |                       |
| Stance Time<br>% <b>Increase</b> | Karunakaran et al. 2020 [56]                       | 107.5 %                     | 2.4 years | 35 %<br>(1-day post) | 191 %<br>(1-day post) |                       |                       |
|                                  |                                                    |                             |           | 19 %<br>(4-day post) | 33 %<br>(4-day post)  |                       |                       |
|                                  |                                                    |                             |           | 19 %<br>(7-day post) | 43 %<br>(7-day post)  |                       |                       |

\*\*\* Stride length represents average percent decrease for all legs (LF, LH, RF, RH).
